# Supplementary material for: Dendritic silica with carbon dots and gold nanoclusters for dual nanozymes
Source: Royal Society of Chemistry journal article supplement (doi:10.1039/c9nj05655f), 2020-01-01
Supplement: c9nj05655f1.pdf [file c9nj05655f1.pdf]

## Supporting Information

### **Dendritic silica with carbon dots and gold nanoclusters for dual nanozymes**

Lirong Zhao,<sup>a, c</sup> Xiangling Ren,<sup>\*, a, c</sup> Jing Zhang,<sup>a</sup> Wei Zhang<sup>b</sup>, Xudong Chen<sup>\*, b</sup>

Xianwei Meng<sup>\*, a</sup>

<sup>a</sup> Laboratory of Controllable Preparation and Application of Nanomaterials, CAS Key Laboratory of Cryogenics, Technical Institute of Physics and Chemistry, Chinese Academy of Sciences, Beijing 100190, China

<sup>b</sup> Department of Interventional Radiology, Shenzhen People's Hospital, Second Clinical Medical College of Jinan University, First Affiliated Hospital of Southern University of Science and Technology, Shenzhen 518020, China

<sup>c</sup> University of Chinese Academy of Sciences, Beijing 100049, China

\* Corresponding author: Tel.: +86-010-82543521, E-mail: mengxw@mail.ipc.ac.cn

(X. Meng)

## **Materials and Methods**

### **SOD Activity-Like Detecting.**

A substrate pyrogallol HCl solution (10 mM) was freshly prepared before use. The dSCS-Au NPs with different concentrations were mixed with Tris-HCl buffer solution (pH = 8.2, containing 1 mM EDTA-2Na). The timer started after 10  $\mu$ L of pyrogallol solution was added. The total volume of the mixture was 4 ml. The SOD activities were analysed by monitoring the absorbance change at 325 nm.

### **HRP Activity-Like Detecting.**

The HRP-mimic catalytic reactions were carried out at room temperature with a certain amount of dSCS-Au NPs in 2ml of acetate buffer (pH 4.5) in the presence of H<sub>2</sub>O<sub>2</sub> (10 mM), using 0.2 mg 3,3',5,5'-Tetramethylbenzidine (TMB) as the substrate. The HRP activities of dSCS-Au NPs were analysed by monitoring the absorbance change at 652 nm.

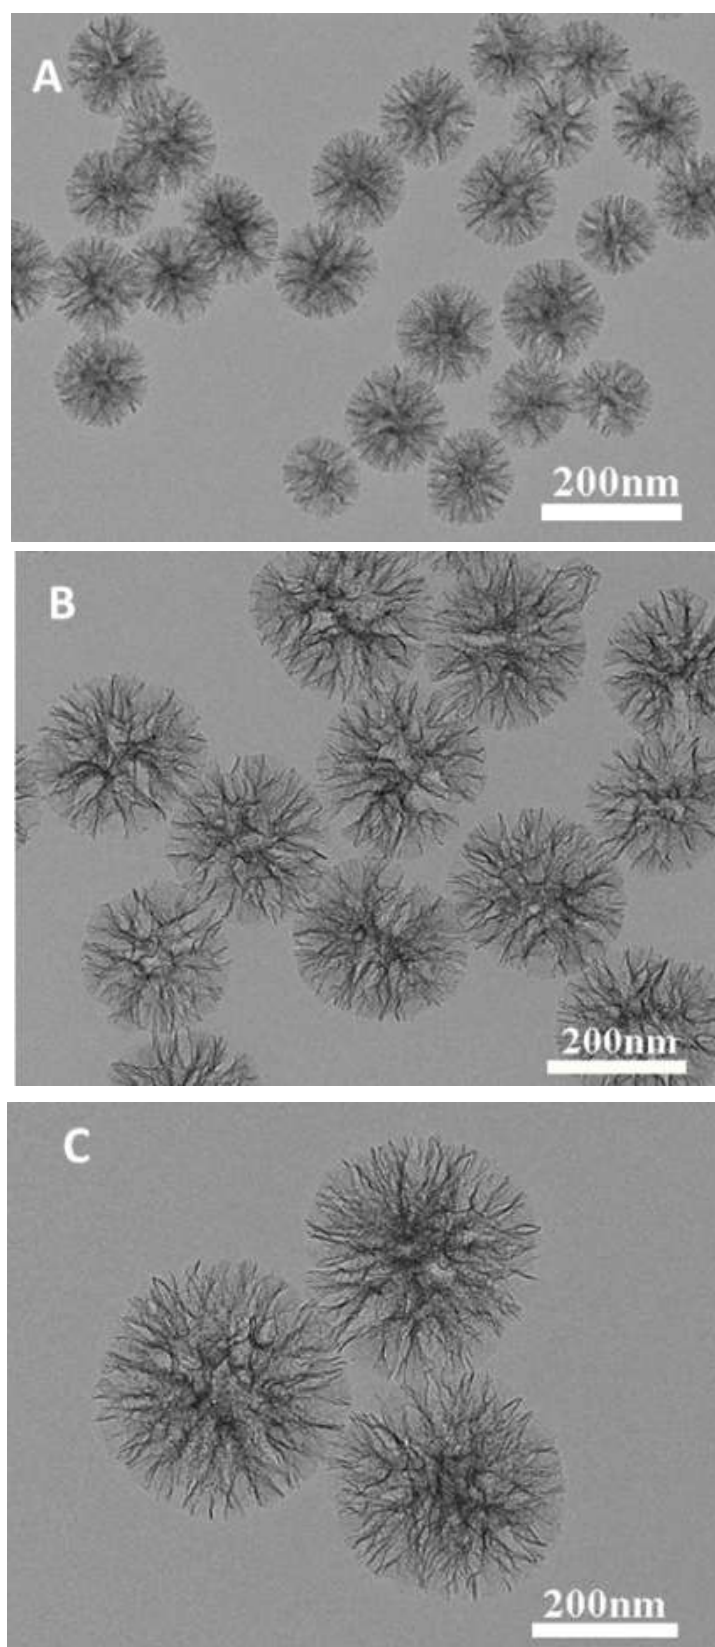

Fig. S1. TEM images of the dSs prepared at the molar ratio of CTAB and NaSal were 1:0.5 (A), 1:1 (B), and 1:1.5 (C).

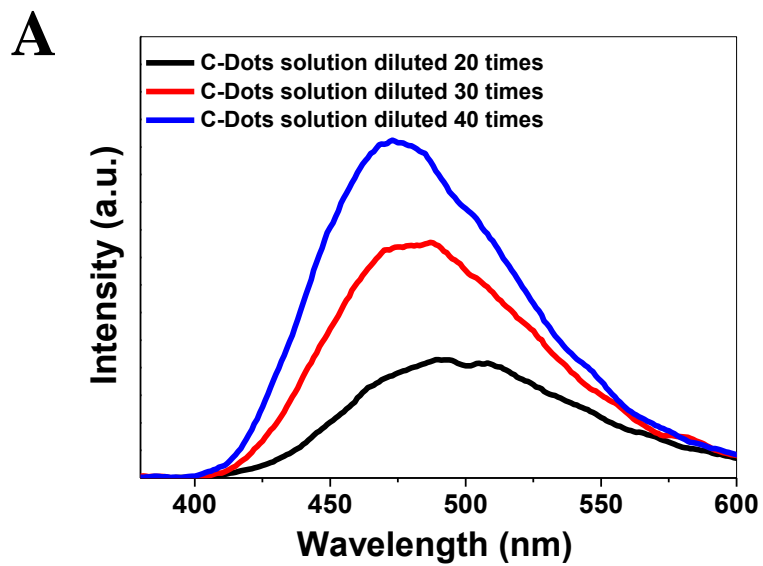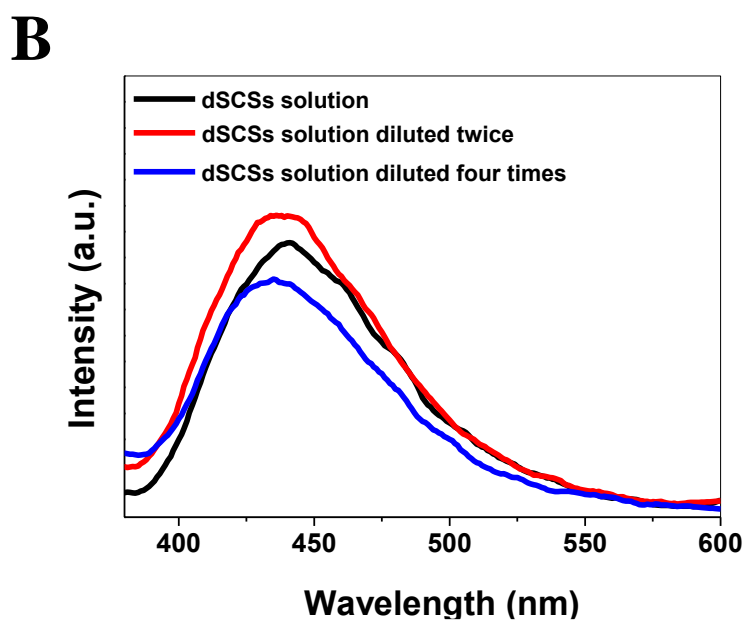

Fig. S2. The fluorescence intensity of C-dots solution (A) and dSCSs solution (B) with different concentrations.

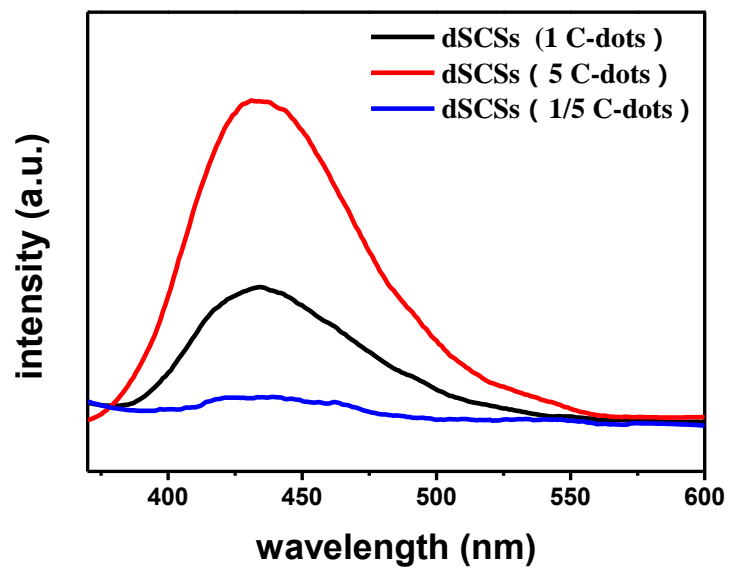

Fig. S3 The fluorescence properties of dSCSs were measured by fluorescence spectroscopy at 350 nm with different loading amounts of C-dots.

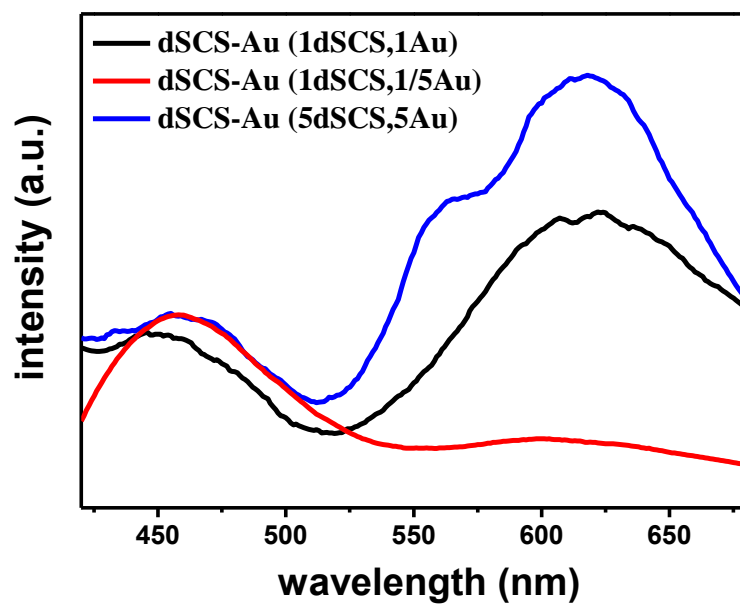

Fig. S4 The fluorescence properties of dSCS-Au NPs were measured by fluorescence spectroscopy at 350 nm with different loading amounts of Au NPs.

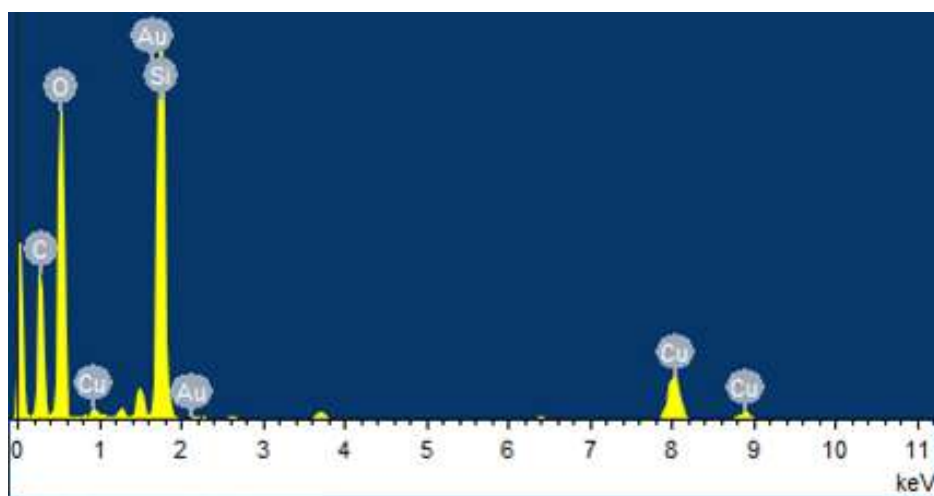

| <b>Elements</b>       | <b>Weight percentage</b> | <b>Atomic percent</b> |
|-----------------------|--------------------------|-----------------------|
| <b>C K</b>            | <b>21.62</b>             | <b>33.32</b>          |
| <b>O K</b>            | <b>36.65</b>             | <b>42.40</b>          |
| <b>Si K</b>           | <b>33.16</b>             | <b>21.85</b>          |
| <b>Cu K</b>           | <b>8.25</b>              | <b>2.40</b>           |
| <b>Au L</b>           | <b>0.31</b>              | <b>0.03</b>           |
| <b>Total quantity</b> | <b>100.00</b>            |                       |

Fig. S5. The electron diffraction spectroscopy of the dSCS-Au NPs sample.

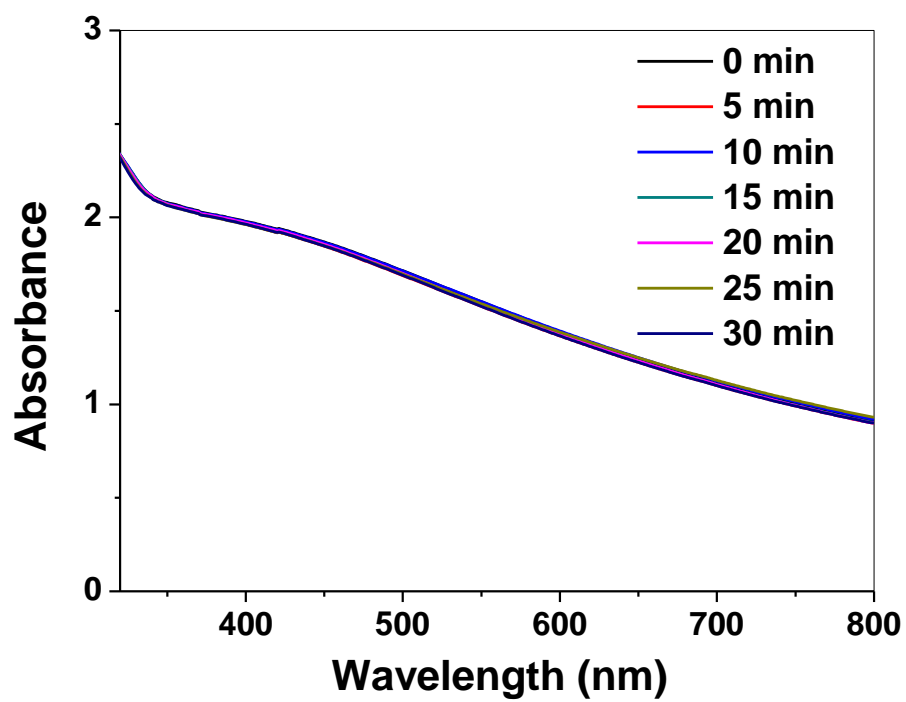

Fig. S6. The UV-Vis absorption spectra of the reaction products of TMB oxidation in the presence of dSCSs without gold particles (pH=4.5).



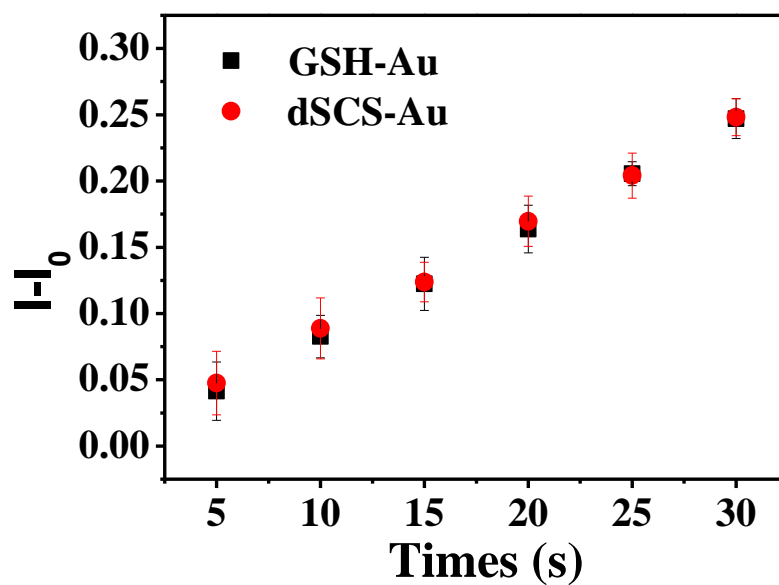

Fig. S7. Time-dependent absorbance changes at 652 nm of HRP activity detection system with GSH-Au NCs or dSCS-Au NPs. The ultraviolet absorptive value of the starting point (0 min) was defined as  $I_0$  and the ultraviolet absorptive value measured at different time was defined as  $I$ .

| <b>Samples</b> | <b>The concentration of samples (mg/mL)</b> | <b>The amount of samples (mg/mL)</b> | <b>The content of Au</b> | <b>The amount of Au (μg/mL)</b> |
|----------------|---------------------------------------------|--------------------------------------|--------------------------|---------------------------------|
| GSH-Au NCs     | 2.3                                         | 0.23                                 | 8.10%                    | 18.63                           |
| dSCS-Au NPs    | 12.9                                        | 1.29                                 | 0.32%                    | 4.128                           |

Tab. S1. The mass percent of Au in GSH-Au NCs and dSCS-Au NPs with ICP.
